# Supplementary material for: Effects of BNP and Sacubitrilat/Valsartan on Atrial Functional Reserve and Arrhythmogenesis in Human Myocardium
Source: PubMed Central journal article supplement (PMC9294287; doi:10.3389/fcvm.2022.859014), 2022-07-05
Supplement: Data_Sheet_1.pdf [file Data_Sheet_1.pdf]

## **Supplemental Material**

### **Functional Experiments**

Biopsies of the RA appendage (size range: 1-2cm x 0,5-2 cm) were collected as part of the standard surgical procedure for patients undergoing open heart surgery with extracorporeal circulation. Patients with active malignancy, congenital heart disease and endocarditis were not enrolled in our study and one patients was excluded due to reported chronical right coronary artery occlusion. Immediately after excision, the tissue was transferred into a cardioplegic solution containing: 100 mM NaCl, 10 mM KCl, 1.2 mM KH<sub>2</sub>PO<sub>4</sub>, 5 mM MgSO<sub>4</sub>, 5 mM MOPS, 50 mM Taurine, 20 mM glucose and 30 mM 2,3-butanedione monoxime, equilibrated to a pH of 7.4. The tissue was then transported to the laboratories and processed into atrial trabeculae for functional measurements and tissue-samples for molecularbiology. Trabeculae were excised using microsurgical scissors and forceps. Human atrial muscle strips with a diameter of <1mm were preferentially isolated, as the risk of central ischemia increases with rising muscle diameter; muscle strips with a diameter <0.65 mm were excluded After the end of the experiments (trabeculae) or right after preparation (tissue-samples), all tissue was snapfrozen with liquid nitrogen and stored at -80° up until further analysis. After a resting phase of 10 min in cardioplegic solution, RA trabeculae were transferred into an isometric force transducer system, (Myostation-Intact muscle analysis system, MyoTronic UG, Heidelberg, Germany), hooked up in a loop system and superfused with normal Tyrode (136 mM NaCl, 4 mM KCl, 1 mM MgCl<sub>2</sub>, 10 mM HEPES, 20 mM glucose and 0.2 mM CaCl<sub>2</sub>) at 37°C. CaCl<sub>2</sub> concentration was gradually increased up until 2.5 mM over the course of 10 minutes and RA trabeculae were electrically paced with rectangular pulses (5 ms) field stimulation at 1 Hz and then gradually prestretched to their maximal force of contraction. Maximal isometric twitch force was reached when the increase of muscle prestretch did not cause greater force of contraction. Each contractile cycle was recorded and transferred to the graphical user interface

MyoDat (MyoTronic, Heidelberg, Germany) on a computer assigned to each setup. Analysis of systolic and diastolic functional parameters was performed with the program MyoViewer (MyoTronic UG, Heidelberg, Germany). Furthermore, the occurrence of mechanical evidence for arrhythmias (=aftercontractions) was determined.

### **VASP Western Blot**

Atrial muscle strips from n=5 patients (control strips and strips treated with LBQ/Val) were homogenized at 4°C in lysis buffer with the following composition: 20 mM Tris-HCl, pH 7.4, 137 mM NaCl, 10% glycerol, 1% NP 40, 20 mM NaF, 1 mM sodium pyrophosphate, 50 mM  $\beta$ -glycerophosphate, 10 mM EDTA, 1 mM EGTA, 1 mM PMSF, 4  $\mu$ g/ml aprotinin, 4  $\mu$ g/ml pepstatin A, and 4  $\mu$ g/ml leupeptin. For Western blotting 35  $\mu$ g of tissues homogenates were run on on 4-12% Bis-Tris polyacrylamide gels and then transferred to nitrocellulose membranes. Non-specific binding was blocked with 5% dried milk in Tris-buffered saline (pH 7.4) containing 0.1% Tween-20. Membranes were probed with anti-Phospho-Ser239 VASP (1/500) or anti-Phospho-Ser157 VASP (1/750)(both Cell Signaling) and anti-VASP (1/750) (immunoGlobe) overnight at 4°C. Anti-rabbit IgG linked with IRDye 800CW and anti-mouse IgG linked with 680RD (both LI-COR) were used as a secondary antibody. The signal was detected with Odyssey CLx System. The band intensities were determined by Image Studio software (LI-COR).

### **NEP ELISA**

The NEP levels were determined in LV and RA from n=10 patients with end-stage HF. Tissue was analyzed by the ELISA kit (EHMME, Thermo Scientific) according to the manufacturer's instruction. Briefly, the frozen tissue samples were homogenized at 4°C in lysis buffer with the following composition: 20 mM Tris-HCl, pH 7.4, 137 mM NaCl, 1% NP 40, 20 mM NaF, 1 mM sodium pyrophosphate, 50 mM  $\beta$ -glycerophosphate, 10 mM EDTA, 1 mM EGTA, 1 mM

PMSF, 4 µg/ml aprotinin, 4 µg/ml pepstatin A, 4 µg/ml leupeptin. and centrifuged at 12,000 ×g for 10 min to remove debris. The total protein concentration in supernatants was determined via Pierce BCA assay (Thermo Scientific). Samples were then diluted 1:5 and assessed in duplicate The concentration (ng/ml) was normalized to total protein content (ng/mg total protein).

**A**

| Patient characteristics    |            | Medication             |          |
|----------------------------|------------|------------------------|----------|
| Age                        | 52 (45-56) | ACE Inhibitors/ AT1-RB | 70% 7/10 |
| Sex (male)                 | 50% (5/10) | Beta-Blocker           | 80% 8/10 |
| BMI                        | 23 (21-31) | Diuretics              | 80% 8/10 |
| NYHA III/IV                | 80% 8/10   | MRI                    | 80% 8/10 |
| Heart failure              | 100% 10/10 | ARNI                   | 10% 1/10 |
| Arterial hypertension      | 30% 3/10   | Digitoxin              | 10% 1/10 |
| Dyslipidemia               | 60% 6/10   | Calcium Antagonists    | 10% 1/10 |
| Adipositas                 | 30% 3/10   | Amiodaron              | 30% 3/10 |
| Diabetes mellitus          | 30% 3/10   | Statine                | 60% 6/10 |
| Coronary artery disease    | 60% 6/10   | Oral antidiabetic      | 10% 1/10 |
| Atrial Fibrillation        | 50% 5/10   | Insulin                | 0        |
| COPD                       | 20% 2/10   | Main diagnosis         |          |
| Chronic kidney disease     | 30% 3/10   | Ischaemic CM           | 40% 4/10 |
| Post CABG/AVR/MVR          | 40% 4/10   | Dilatative CM          | 30% 3/10 |
| Device (ICD, PM)           | 80% 8/10   | Mycarditis             | 20% 2/10 |
| PAH                        | 40% 4/10   | Restrictive CM         | 10% 1/10 |
| Type of surgery            |            |                        |          |
| Heart transplantation      | 70% 7/10   |                        |          |
| Assist device implantation | 30% 3/10   |                        |          |

**B**

| Echo data                        |              |      |
|----------------------------------|--------------|------|
| LVEF (%)                         | 20 (15-26)   | N=10 |
| LVEDD (mm)                       | 68 (60-82)   | N=10 |
| IVSd (mm)                        | 12 (10-13)   | N=10 |
| PWd (mm)                         | 10 (8-12)    | N=10 |
| LA volume biplan (ml)            | 106 (78-122) | N=10 |
| LAVI (ml/m <sup>2</sup> )        | 51 (40-61)   | N=10 |
| LA diameter (mm)                 | 46 (41-50)   | N=10 |
| LA emptying fraction (norm >37%) | 27 (18-34)   | N=10 |
| LA strain (>23% norm)            | 11 (7-16)    | N=9  |
| RVEF (%)                         | 37 (33-41)   | N=10 |
| RA area(cm <sup>2</sup> )        | 23 (17-33)   | N=10 |
| RA diameter (mm)                 | 44 (30-52)   | N=10 |
| RA emptying fraction (norm >37%) | 31 (29-38)   | N=8  |
| RA strain reservoir+conduit      | 19 (16-40)   | N=6  |
| E/E'                             | 0            | N=0  |
| TAPSE (mm)                       | 14 (13-16)   | N=9  |
| RVEDD (mm)                       | 40 (33-49)   | N=10 |
| sPAP (mmHg)                      | 38 (35-44)   | N=4  |

**Supplementary Table 1: Patient characteristics for RA and LV NEP expression.** Data is presented as ‘median (IQR)’ or ‘percent (n patients/all patients)’. (a) represents clinical characteristics, (b) represents results from echocardiographic assessment

*Abbreviations: CABG: coronary artery bypass graft, AVR: aortic valve replacement/repair;*

*MVR: mitral valve replacement/repair; PAH: pulmonary artery hypertension; MRI:*

*mineralocorticoid receptor inhibitor; ARNIs: angiotensin receptor-neprilysin inhibitor; CM:*

*cardiomyopathy; LV: left ventricle, LA: left atrium, RA: right atrium*

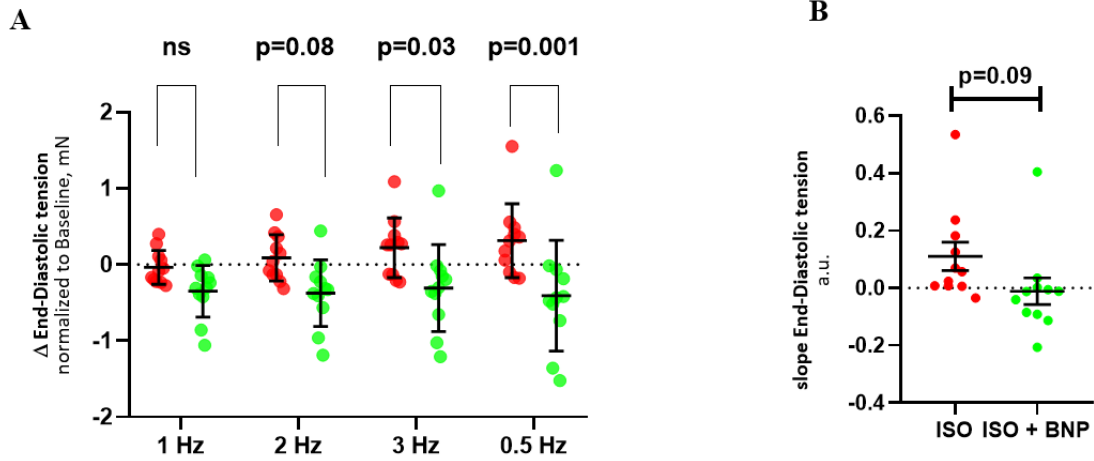

### Supplement Figure 1: Effect of BNP on diastolic tension

Development of diastolic tension during varying stimulation frequencies is shown in (A), and corresponding diastolic tension slope is shown in (B). Data is shown as mean±SEM; each data point represents one muscle strip. *ISO*: isoproterenol, *BNP*: brain natriuretic peptide

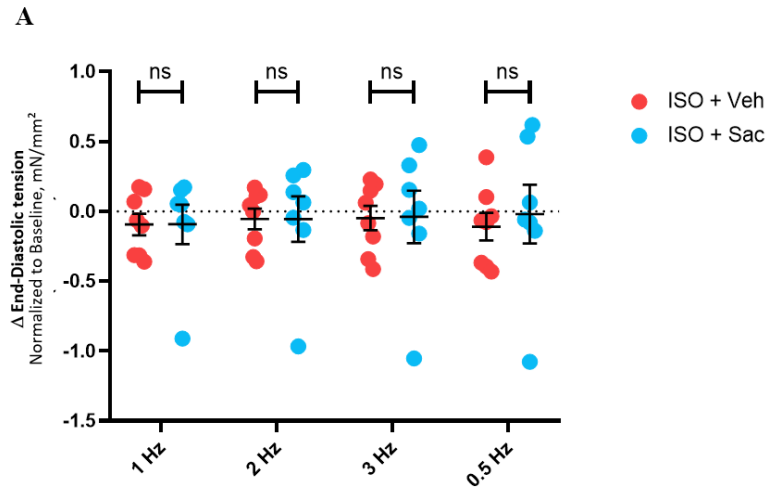

### Supplement Figure 2: Effect of Sac on diastolic tension

The development of diastolic tension during varying stimulation frequencies in muscle strips pretreated with Sac or a vehicle and additional ISO treatment is shown in (A). Data is shown as mean±SEM; each data point represents one muscle strip. *Veh*: vehicle (*DSMO*); *Sac*: *sacubitrilat*

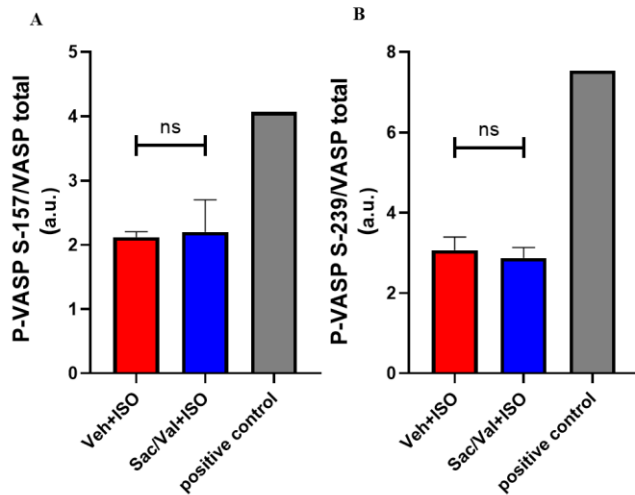

### Supplement Figure 3: Effects of Sac/Val on VASP phosphorylation

The effect of Sac/Val on VASP Serine-157 (A) and VASP Serine-239 Phosphorylation is shown in this table. *Veh*: vehicle (DSMO); *Sac*: sacubitrilat; *Val*: valsartan

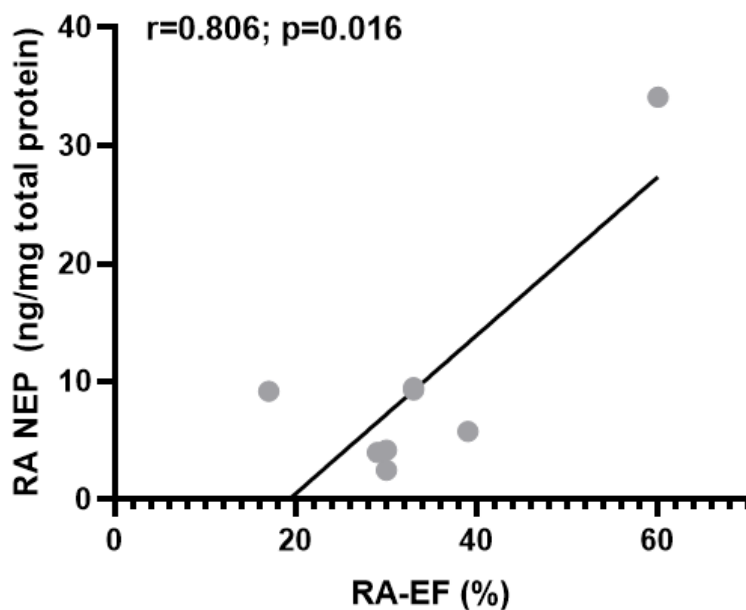

### Supplement Figure 4: Correlation of right atrial NEP expression and right atrial EF

Each point represents data from one patient. *RA*: right atrium; *NEP*: neprilysin; *EF*: ejection fraction.
